# Supplementary material for: Valence shell threshold photoelectron spectroscopy of C3Hx (x = 0–3)
Source: Royal Society of Chemistry journal article supplement (doi:10.1039/c8cp00510a), 2018-01-01

## Supplementary information

### Valence shell threshold photoelectron spectroscopy of the $C_3H_x$ ( $x=0-3$ )

Gustavo A. Garcia<sup>a</sup>, Bérenger Gans<sup>b</sup>, Julia Krüger<sup>a</sup>, Fabian Holzmeier,<sup>a,c</sup> Anja Röder,<sup>c</sup> Allan Lopes,<sup>d</sup> Christa Fittschen,<sup>e</sup> Christian Alcaraz<sup>d</sup> and Jean-Christophe Loison<sup>f\*</sup>

#### SI1:

Energies at the CCSD(T)-F12/AVQZ (in hartree at 0 K), geometries at the CCSD(T)-F12/AVQZ and frequencies (in  $cm^{-1}$ , unscaled) calculated at the at the CCSD(T)-F12/AVTZ level.

| Species<br>(Energy, hartree)                                                                                            | Relative<br>energies<br>(kJ/mol) | Geometries                                                                                                                                                                                                                                                                                                                                                                       | Frequencies ( $cm^{-1}$ )<br>ZPE (hartree)                                                                                    |
|-------------------------------------------------------------------------------------------------------------------------|----------------------------------|----------------------------------------------------------------------------------------------------------------------------------------------------------------------------------------------------------------------------------------------------------------------------------------------------------------------------------------------------------------------------------|-------------------------------------------------------------------------------------------------------------------------------|
| 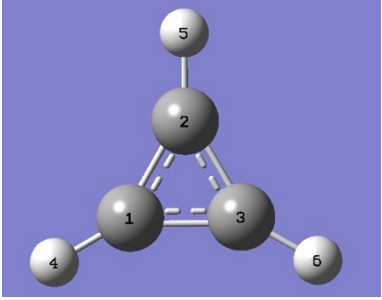<br>c- $C_3H_3^+$<br>(-115.55847522)  | 0                                | geometry={<br>C1;<br>C2,1,B1;<br>C3,2,B2,1,A1;<br>H1,1,B3,2,A2,3,D1;<br>H2,2,B4,1,A3,3,D2;<br>H3,3,B5,2,A4,1,D3}<br><br>B1 = 1.3626 ANG<br>B2 = 1.3626 ANG<br>B3 = 1.0797 ANG<br>B4 = 1.0797 ANG<br>B5 = 1.0797 ANG<br>A1 = 60.00 DEGREE<br>A2 = 150.00 DEGREE<br>A3 = 150.00 DEGREE<br>A4 = 150.00 DEGREE<br>D1 = 180.00 DEGREE<br>D2 = 180.00 DEGREE<br>D3 = 180.00 DEGREE     | 761.6, 944.4, 944.4, 1017.0,<br>1017.0, 1051.9, 1319.0,<br>1319.0, 1641.3, 3254.4,<br>3254.4, 3301.2,<br><br>ZPE = 0.04516528 |
| <br>l- $C_3H_3^+$<br>(-115.51154818) | +116                             | geometry={<br>C1;<br>C2,1,B1;<br>C3,2,B2,1,A1;<br>H1,1,B3,2,A2,3,D1;<br>H2,1,B4,2,A3,3,D2;<br>H3,3,B5,2,A4,4,D3}<br><br>B1 = 1.3490 ANG<br>B2 = 1.2305 ANG<br>B3 = 1.0873 ANG<br>B4 = 1.0873 ANG<br>B5 = 1.0742 ANG<br>A1 = 180.00 DEGREE<br>A2 = 120.33 DEGREE<br>A3 = 120.33 DEGREE<br>A4 = 180.00 DEGREE<br>D1 = 6.9234 DEGREE<br>D2 = 186.8545 DEGREE<br>D3 = 45.2693 DEGREE | 258.4, 293.9, 629.5, 882.3,<br>1038.2, 1119.0,<br>1132.7, 1479.0, 2120.7,<br>3115.8, 3225.0, 3356.7,<br><br>ZPE = 0.04249012  |

**SI2:**

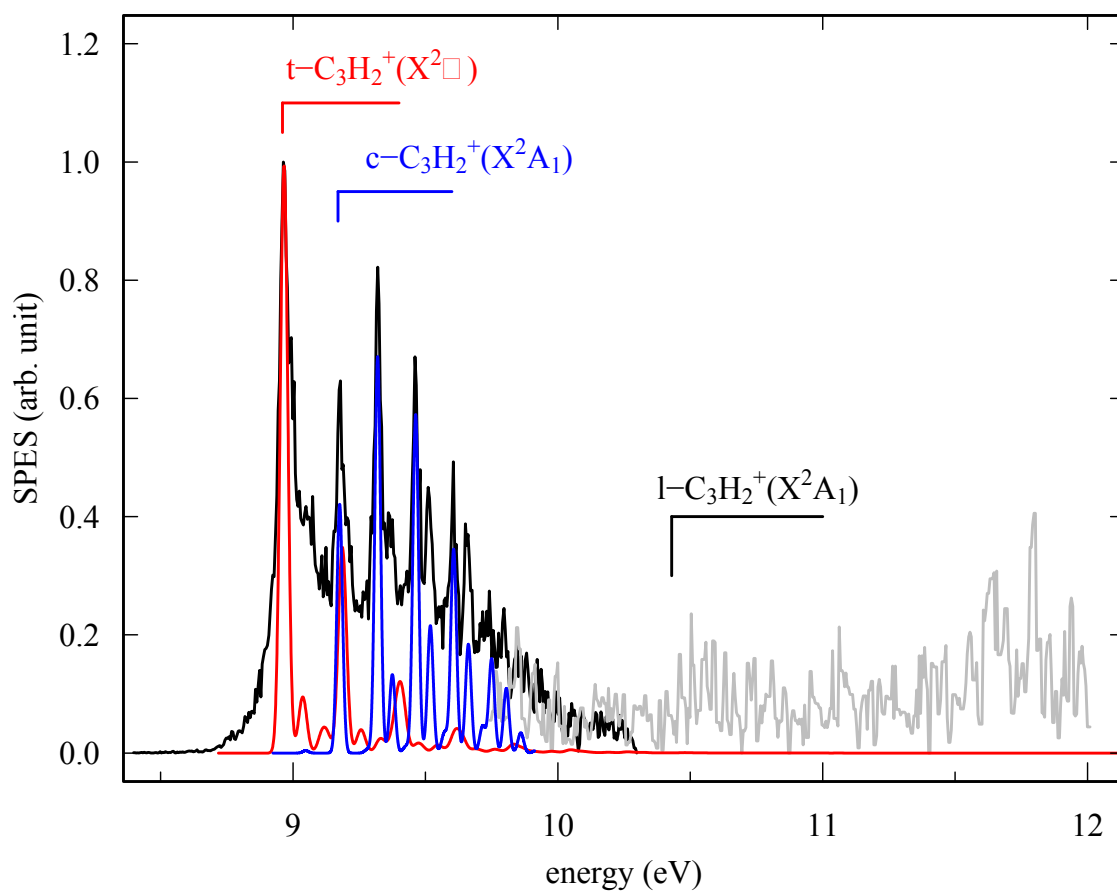

Experimental SPES of  $\text{C}_3\text{H}_2$  in the 8.5-12 eV range. The curve in grey has been obtained using the  $\text{F} + \text{CH}_4$  reaction leading to a smaller production of  $\text{C}_3\text{H}_2$ .

**SI3:**

Definition of the HC-C-CH and H-CCC-H angles of Figure 6:

HC-C-CH (CCC "bending"):

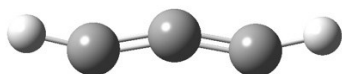

H-CCC-H (H-CC "bending"):

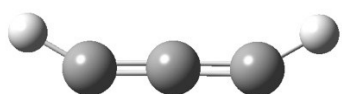

Supplement: c8cp00510a1.pdf [file c8cp00510a1.pdf]
